# Supplementary material for: Ag doped Cs3Cu2Br5 scintillator for high-resolution X-ray imaging
Source: Royal Society of Chemistry journal article supplement (doi:10.1039/d5ce00185d), 2025-01-01
Supplement: d5ce00185d1.pdf [file d5ce00185d1.pdf]

## Supporting Information (SI)

# Ag Doped $\text{Cs}_3\text{Cu}_2\text{Br}_5$ Scintillator for High-Resolution X-ray Imaging

*Yinkun Liao<sup>a1</sup>, Yibo Hu<sup>b1</sup>, Yuanhao Zhou<sup>b</sup>, Jingkun Chen<sup>b</sup>, Kuan Ren<sup>c</sup>, Xue Yang<sup>b</sup>, Meng Gu<sup>b,d</sup>, Jingtai Zhao<sup>d</sup>, Qianli Li<sup>b\*</sup>, and He Feng<sup>b\*</sup>*

<sup>a</sup> Taixing Smelting Plant Co.,Ltd, Jiangsu Province, TaiZhou, 225400, China;

<sup>b</sup> School of Materials Science and Engineering, Shanghai University, Shanghai 200444, China;

<sup>c</sup> Laser Fusion Research Center, China Academy of Engineering Physics, Mianyang, 621022, China;

<sup>d</sup> School of Materials Science and Engineering, Guilin University of Electronic Technology, Guilin 541004, China.

<sup>1</sup> These authors contributed equally to this work.

\*Qianli Li: [liqianli@shu.edu.cn](mailto:liqianli@shu.edu.cn)

\*He Feng: [fh117@shu.edu.cn](mailto:fh117@shu.edu.cn)

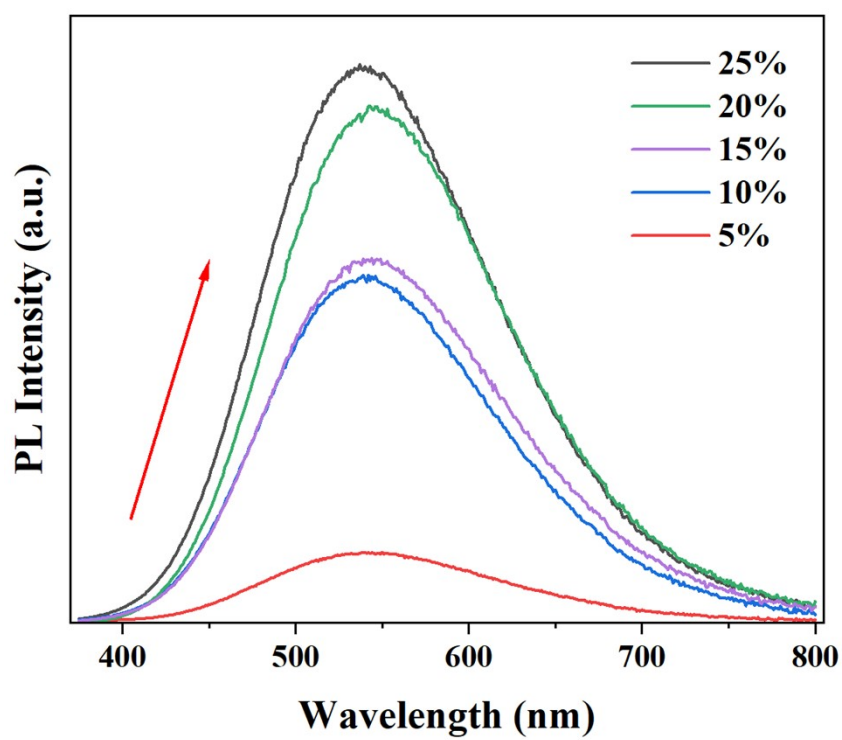

Figure S1 PL spectra of 0-25% Ag.

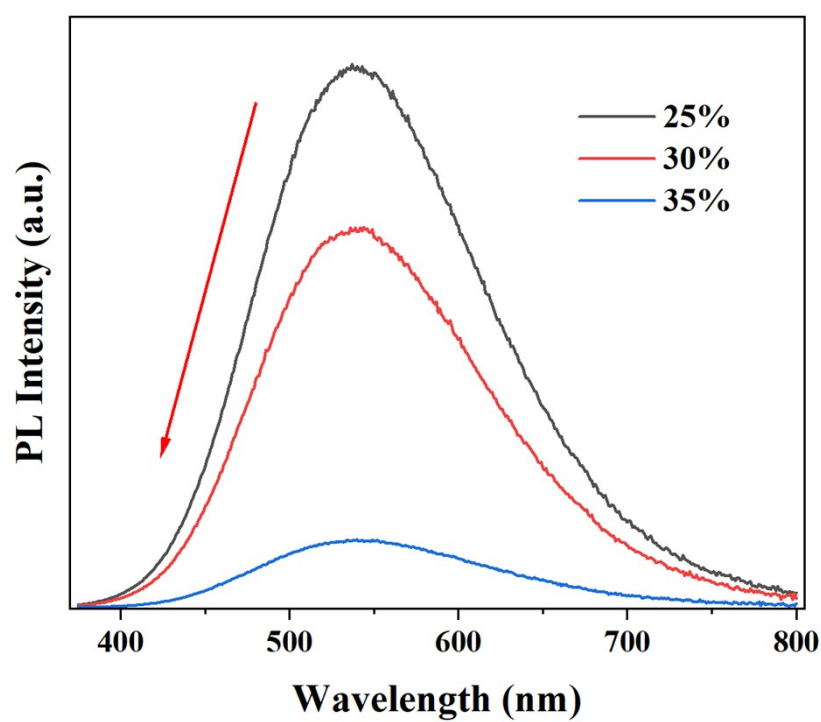

Figure S2 PL spectra of 25-35% Ag.

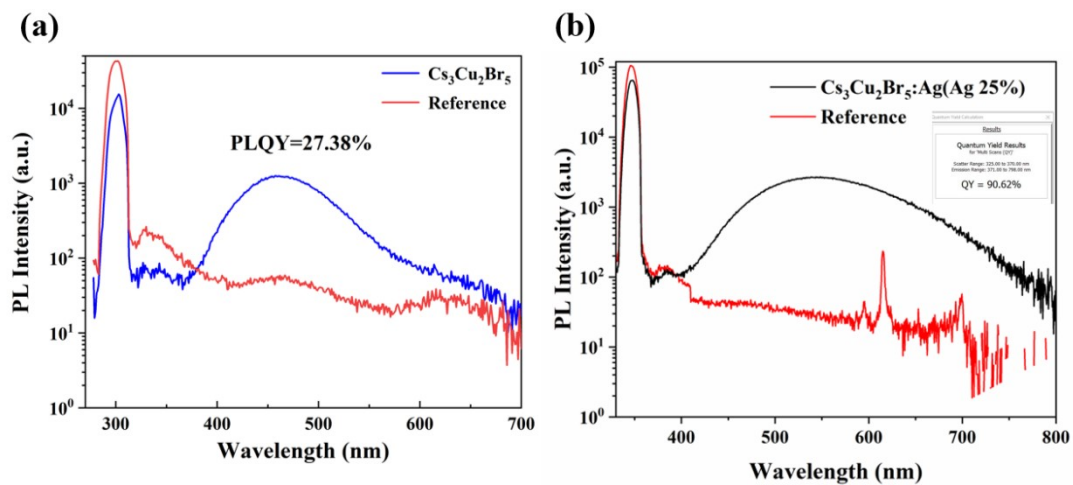

Figure S3 (a) PLQY of  $\text{Cs}_3\text{Cu}_2\text{Br}_5$ . (b) PLQY of  $\text{Cs}_3\text{Cu}_2\text{Br}_5:\text{Ag}$  (Ag 25%).

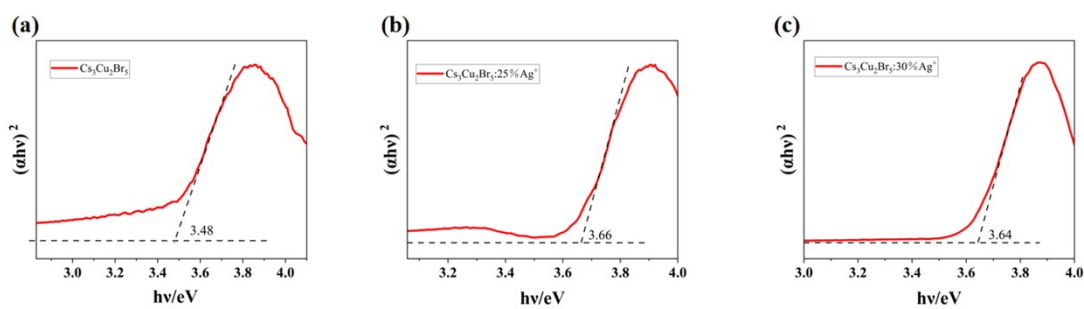

Figure S4 The Tauc plots of (a)  $\text{Cs}_3\text{Cu}_2\text{Br}_5$ , (b)  $\text{Cs}_3\text{Cu}_2\text{Br}_5:25\%\text{Ag}$  and (c)  $\text{Cs}_3\text{Cu}_2\text{Br}_5:30\%\text{Ag}$
